# Supplementary material
Source: Springer Nature journal article supplement (https://www.springermedizin.de/resource/supplementary/12916_2012_764_MOESM8_ESM.pdf/9598658)

# Metabolic Pathway Analysis

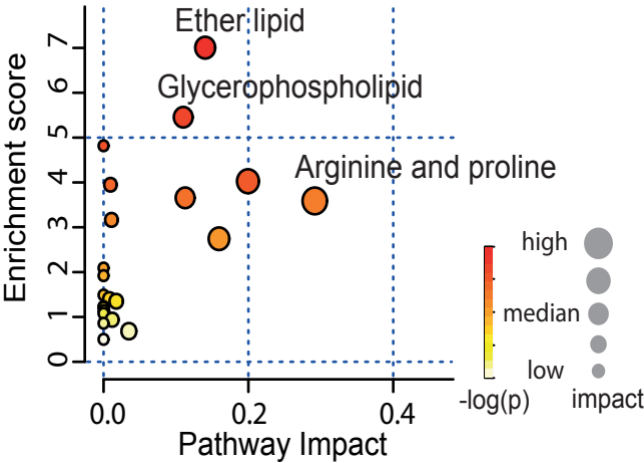

Supplement: MOESM8 [file 9598658]
